# Supplementary material
Source: PubMed Central journal article supplement (PMC6277016)

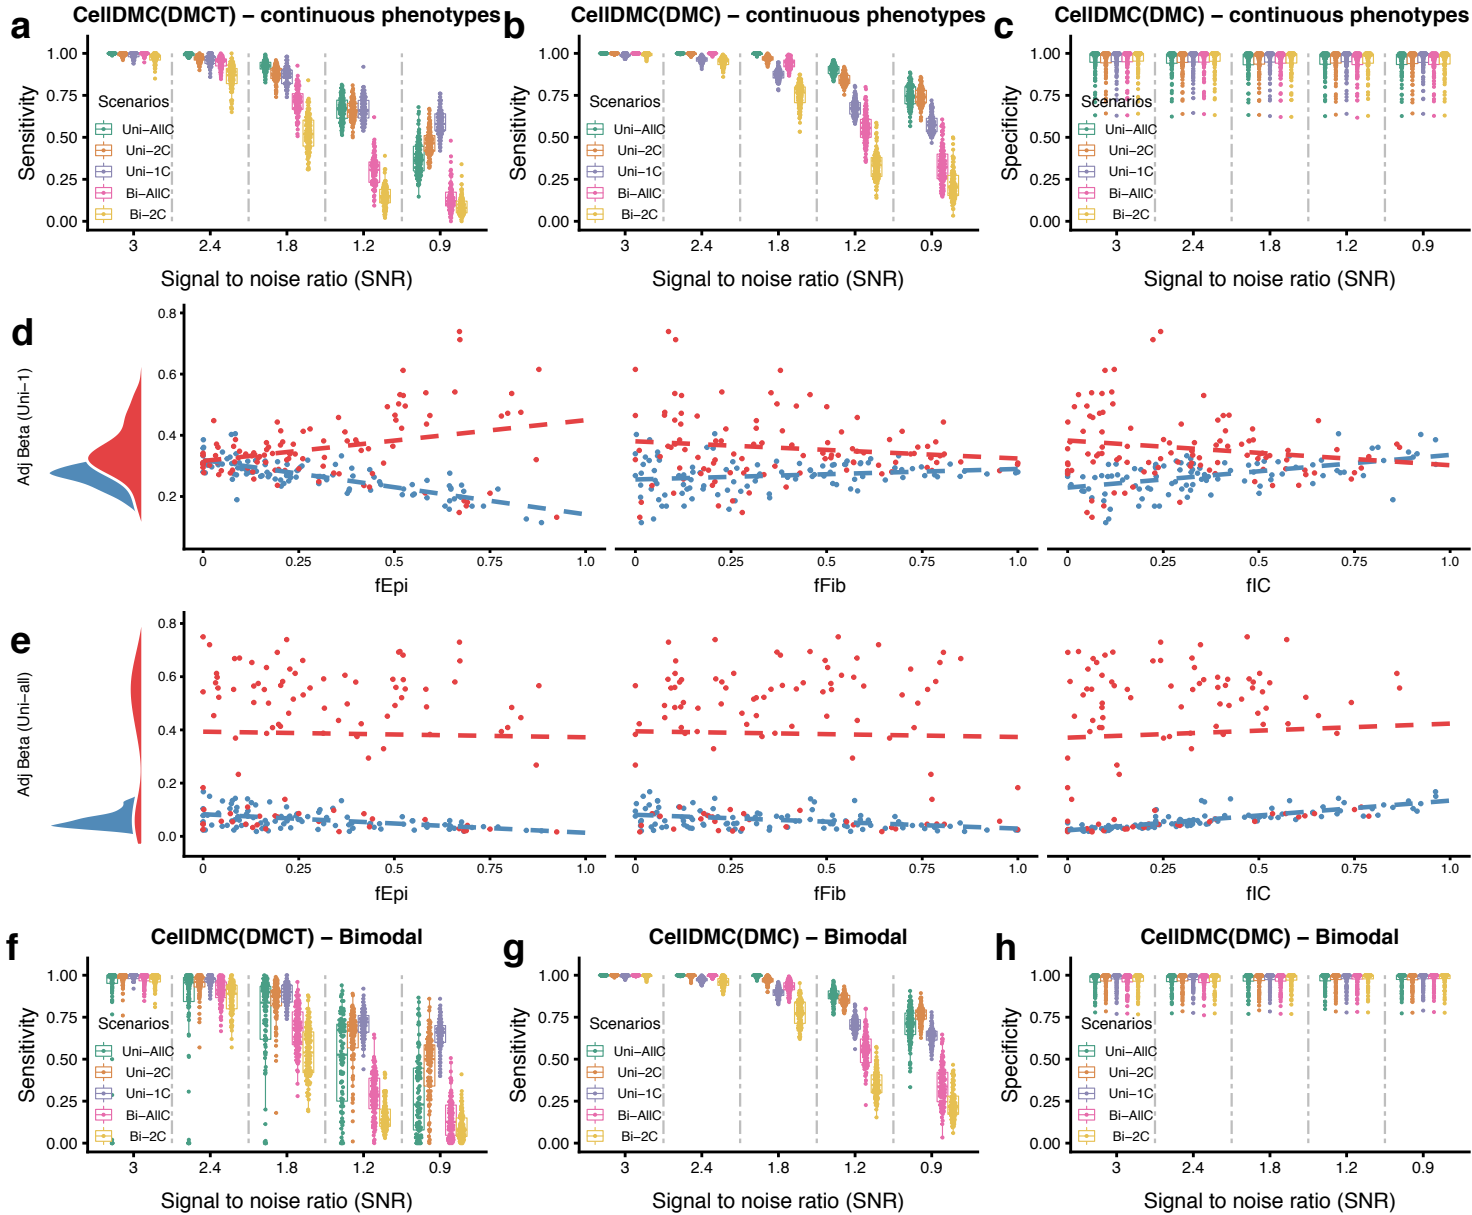

Supplement: NIHMS80081-supplement-Supplementary_data_2.pdf [file NIHMS80081-supplement-Supplementary_data_2.pdf]

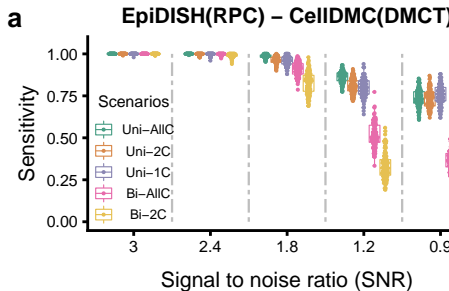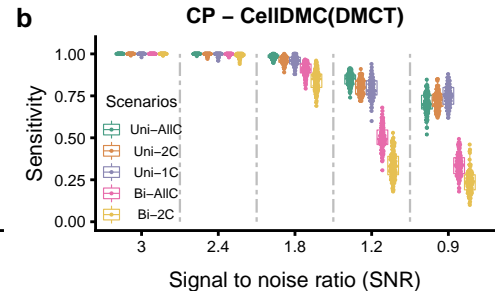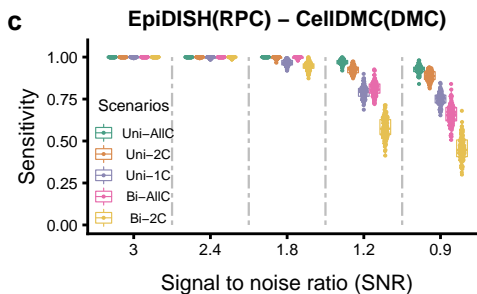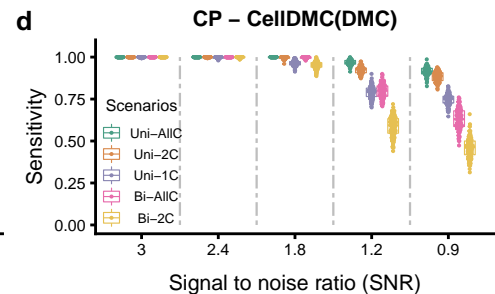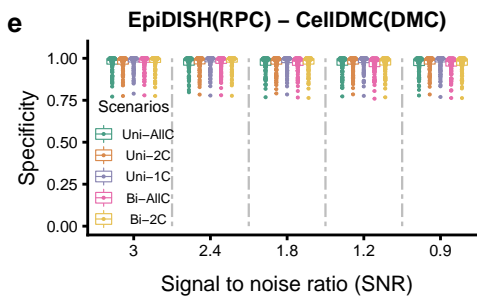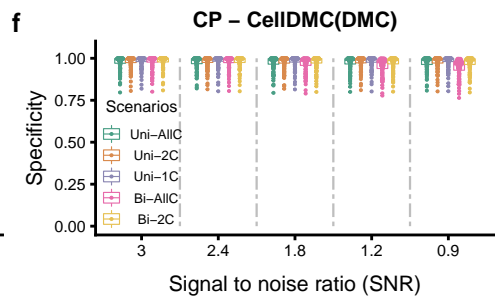

Supplement: NIHMS80081-supplement-Supplementary_data_3.pdf [file NIHMS80081-supplement-Supplementary_data_3.pdf]

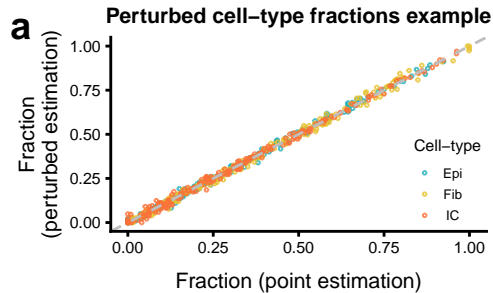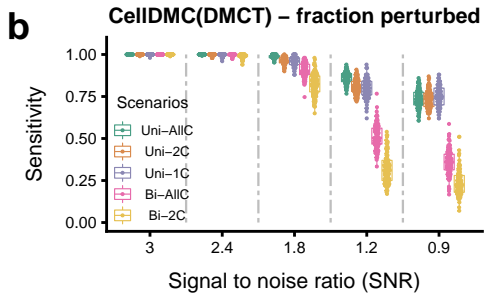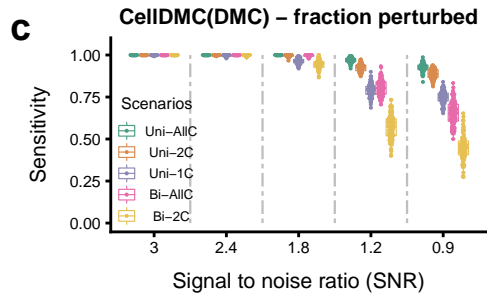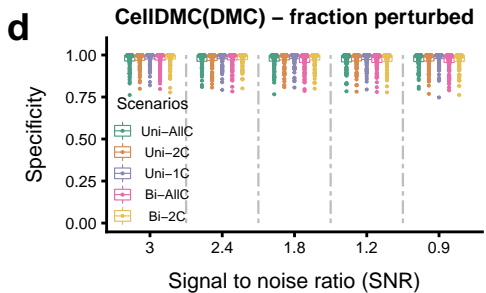

Supplement: NIHMS80081-supplement-Supplementary_data_4.pdf [file NIHMS80081-supplement-Supplementary_data_4.pdf]

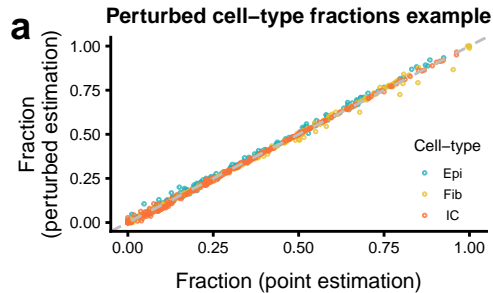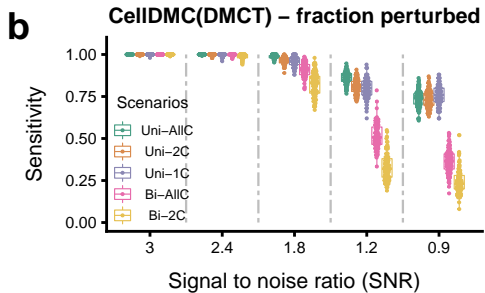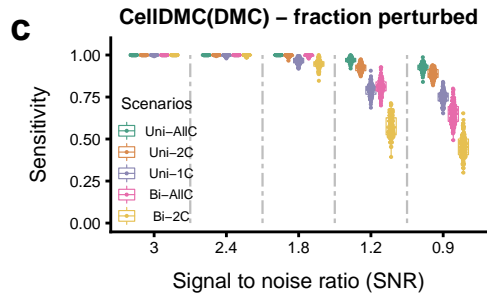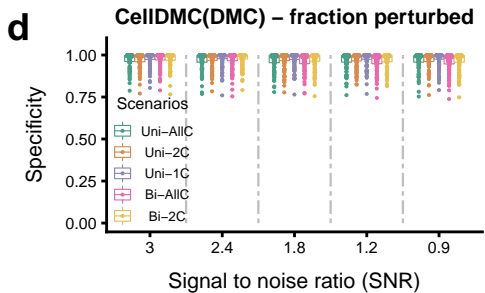

Supplement: NIHMS80081-supplement-Supplementary_data_5.pdf [file NIHMS80081-supplement-Supplementary_data_5.pdf]

# IHEC WGBS

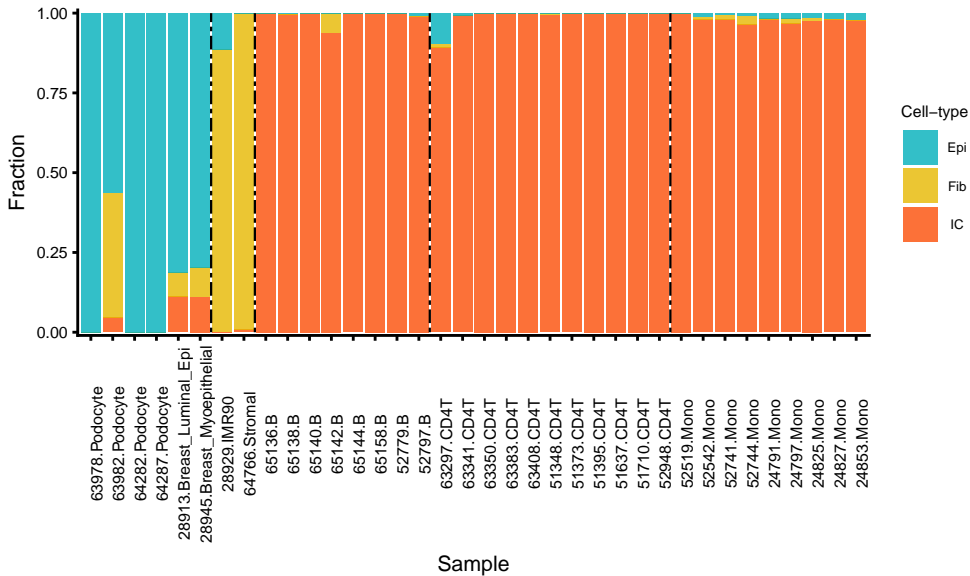

Supplement: NIHMS80081-supplement-Supplementary_data_6.pdf [file NIHMS80081-supplement-Supplementary_data_6.pdf]

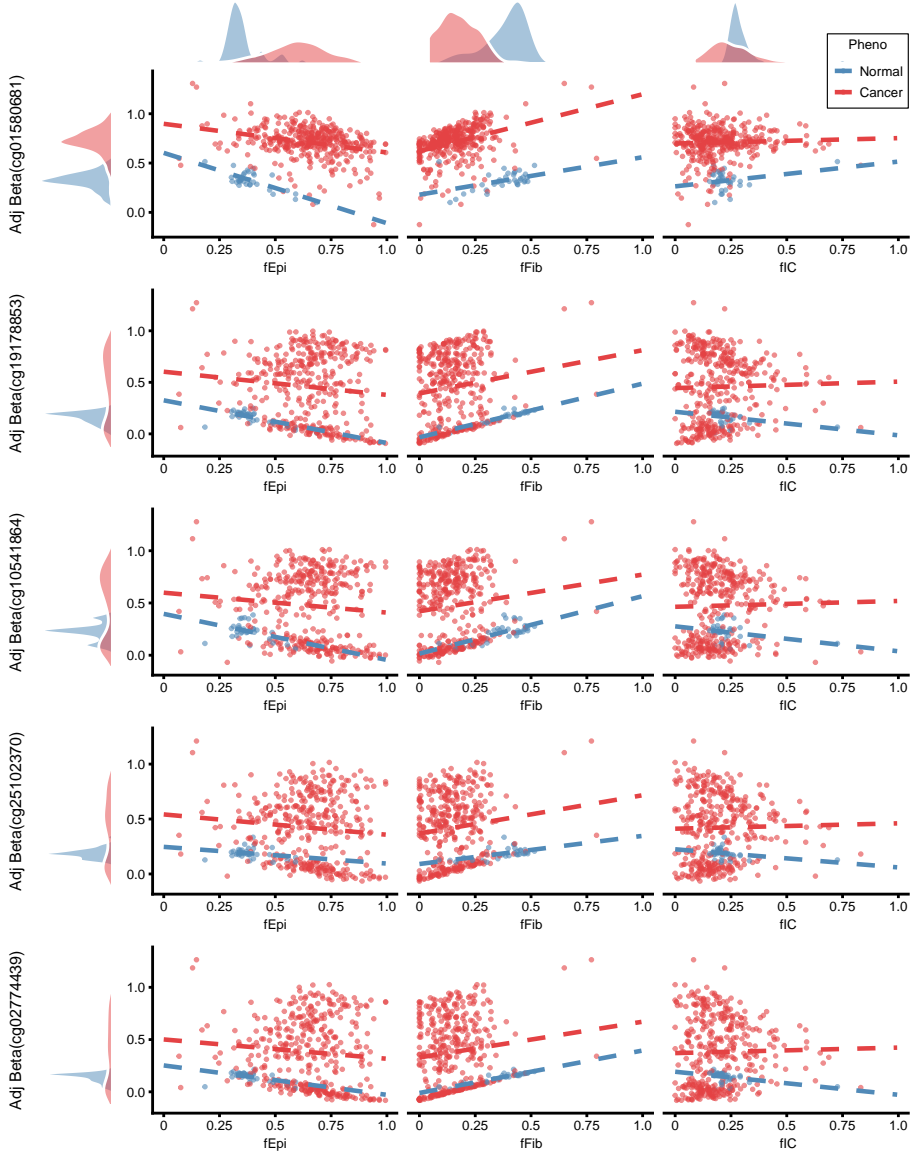

Supplement: NIHMS80081-supplement-Supplementary_data_7.pdf [file NIHMS80081-supplement-Supplementary_data_7.pdf]

# Buccal 790 cell-type fraction

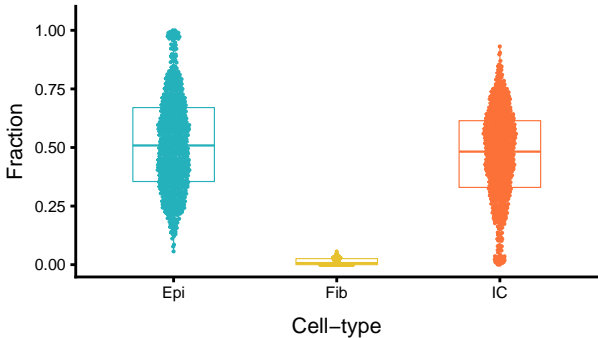

Supplement: NIHMS80081-supplement-Supplementary_data_8.pdf [file NIHMS80081-supplement-Supplementary_data_8.pdf]
